# Supplementary material for: La(OH)3 Multi-Walled Carbon Nanotube/Carbon Paste-Based Sensing Approach for the Detection of Uric Acid—A Product of Environmentally Stressed Cells
Source: MDPI journal article supplement (doi:10.3390/bios12090705), 2022-09-01
Supplement: s1 [file s1]

Supplementary

# La(OH)<sub>3</sub> Multi-Walled Carbon Nanotube/Carbon Paste-Based Sensing Approach for the Detection of Uric Acid—A Product of Environmentally Stressed Cells

Sara Knežević <sup>1,2</sup>, Miloš Ognjanović <sup>3</sup>, Vesna Stanković <sup>4</sup>, Milena Zlatanova <sup>1</sup>, Andrijana Nešić <sup>1</sup>, Marija Gavrović-Jankulović <sup>1</sup> and Dalibor Stanković <sup>1,5,\*</sup>

<sup>1</sup> Faculty of Chemistry, University of Belgrade, Studentski trg 12-16, 11000 Belgrade, Serbia;

<sup>2</sup> University of Bordeaux, CNRS, Bordeaux INP, Institut des Sciences Moléculaires, UMR 5255, 33400 Talence, France

<sup>3</sup> Department of Theoretical Physics and Condensed Matter Physics, “VINČA” Institute of Nuclear Sciences-National Institute of the Republic of Serbia, University of Belgrade, 11000 Belgrade, Serbia

<sup>4</sup> Scientific Institution, Institute of Chemistry, Technology and Metallurgy, National Institute University of Belgrade, 11000 Belgrade, Serbia

<sup>5</sup> Department of Radioisotopes, “VINČA” Institute of Nuclear Sciences-National Institute of the Republic of Serbia, University of Belgrade, 11000 Belgrade, Serbia

\* Correspondence: dalibors@chem.bg.ac.rs

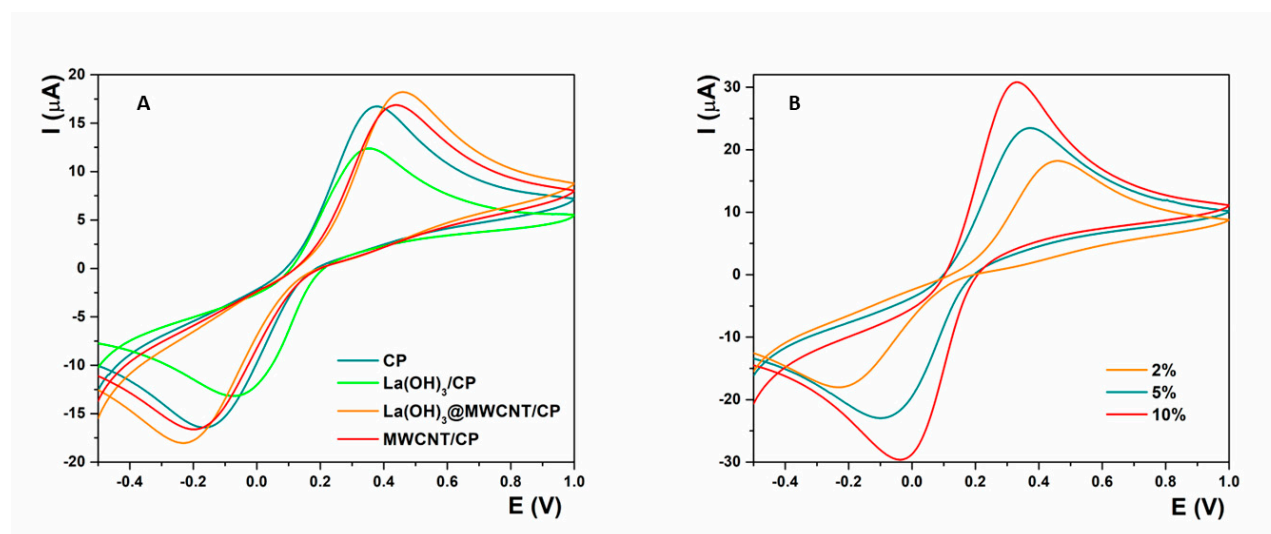

**Figure S1.** Cyclic voltammograms in 5mM Fe<sup>2+/3+</sup> in 0.1 M KCl and 0.1 M PB pH 6, in the potential range from −0.5 V to 1 V at the 50mV/s scan rate of **A**) unmodified CP electrode and electrodes modified with 2% of La(OH)<sub>3</sub>, MWCNT and La(OH)<sub>3</sub>@MWCNT **B**) electrodes modified with 2%, 5% and 10% of La(OH)<sub>3</sub>@MWCNT.

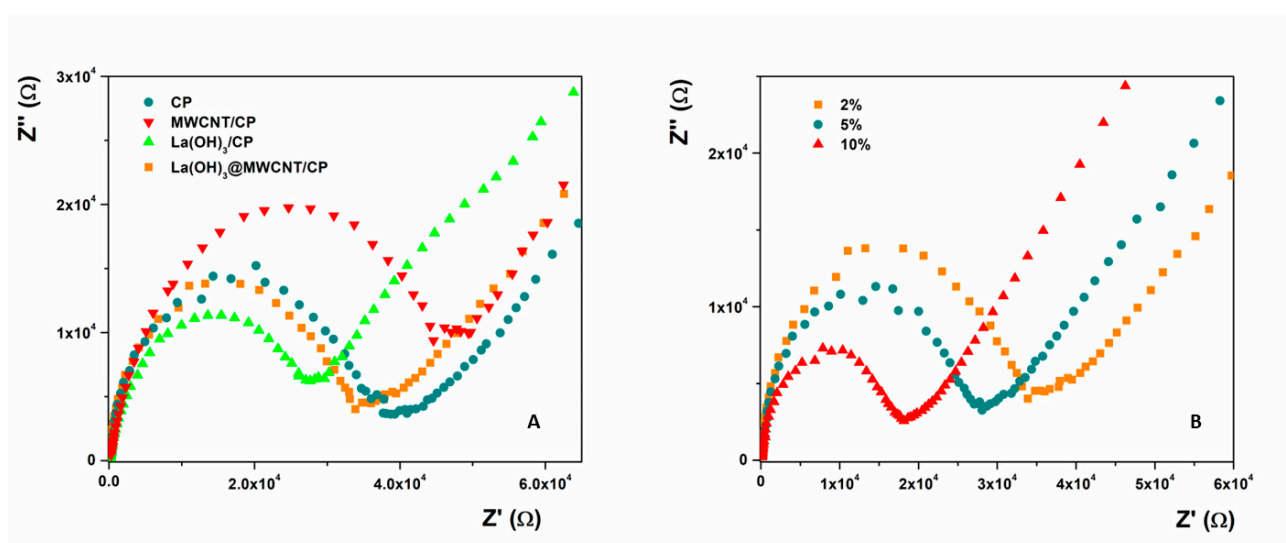

**Figure S2.** EIS spectra in 5 mM  $\text{Fe}^{2+/3+}$  in 0.1M KCl and 0.1 M PB pH 6 on 0.3 V and in the frequency range from 10 kHz to 10 mHz of **A)** unmodified CP electrode and electrodes modified with 2% of  $\text{La(OH)}_3$ , MWCNT and  $\text{La(OH)}_3@\text{MWCNT}$  **B)** electrodes modified with 2%, 5% and 10% of  $\text{La(OH)}_3@\text{MWCNT}$ .

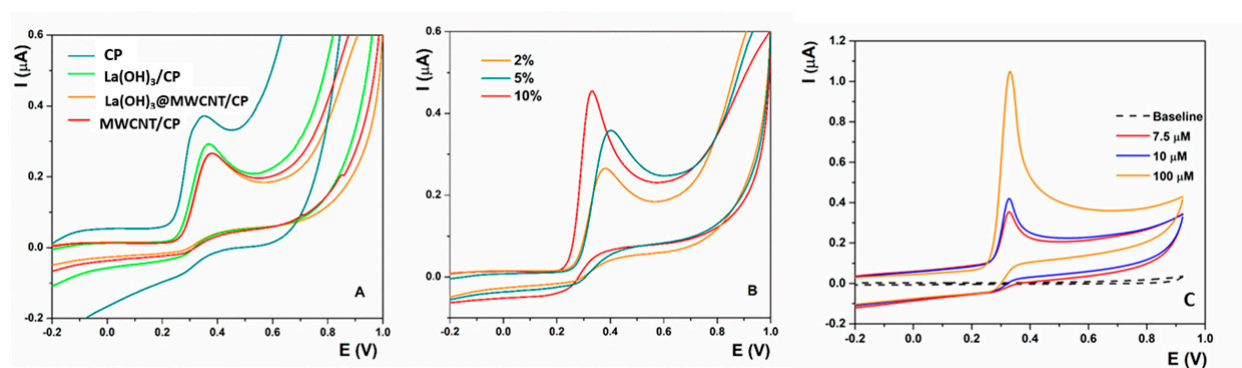

**Figure S3.** **(A)** CV in 0.1 M PB pH 6 in the presence of 10  $\mu\text{M}$  UA - unmodified CP electrode and electrodes modified with 2% of  $\text{La(OH)}_3$ , MWCNT and  $\text{La(OH)}_3@\text{MWCNT}$  **(B)** CV in 0.1 M PB pH 6 in the presence of 10  $\mu\text{M}$  UA - electrodes modified with 2%, 5% and 10% of  $\text{La(OH)}_3@\text{MWCNT}$  **(C)** CV in 0.1 M PB pH 6 in the presence of 7.5; 10 and 100  $\mu\text{M}$  UA using electrode modified with 10% of  $\text{La(OH)}_3@\text{MWCNT}$ .

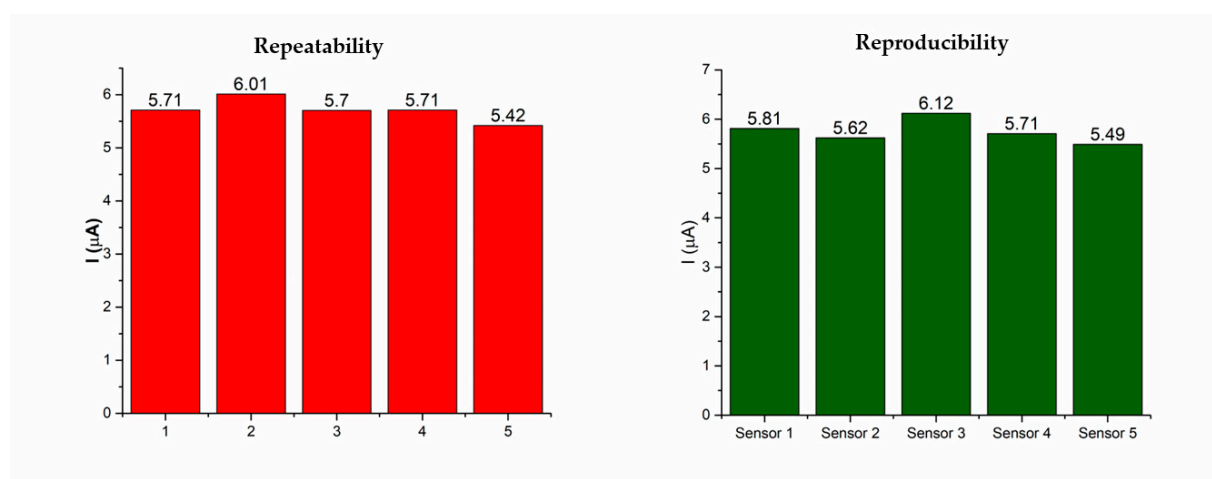

**Figure S4.** Repeatability and reproducibility studies for proposed sensor.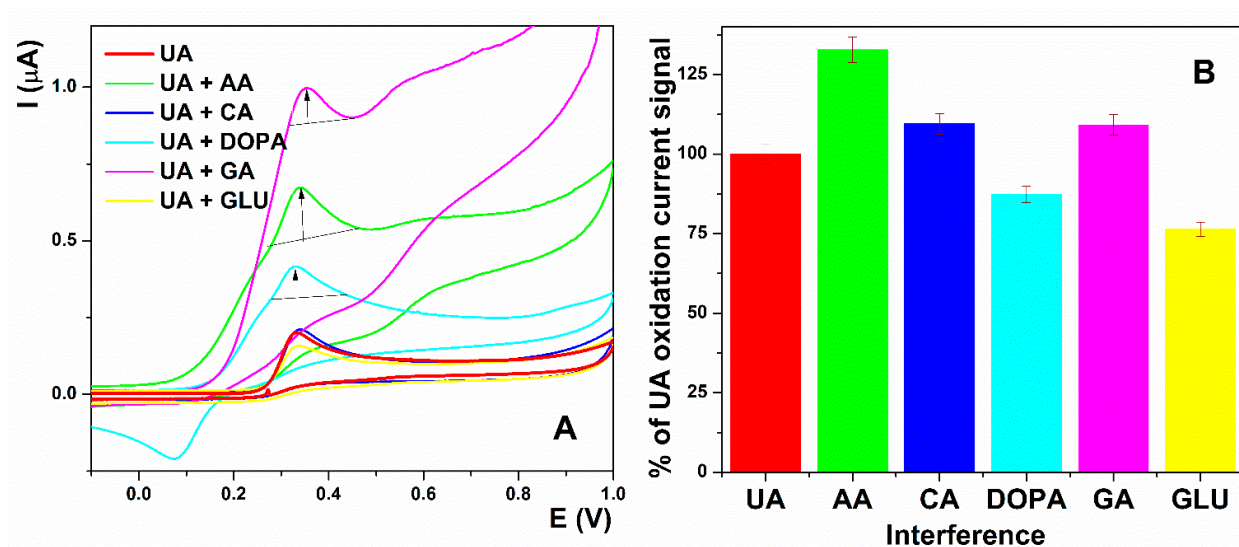**Figure S5.** Studying the impact of potential interferences on UA detection **A)** CV in 0.1 M PB pH 6, at the potential range from  $-0.05$  V to 1 V at the scan rate 50 mV/s, **B)** Histogram – percent of the anodic peak current which arose from the oxidation of UA.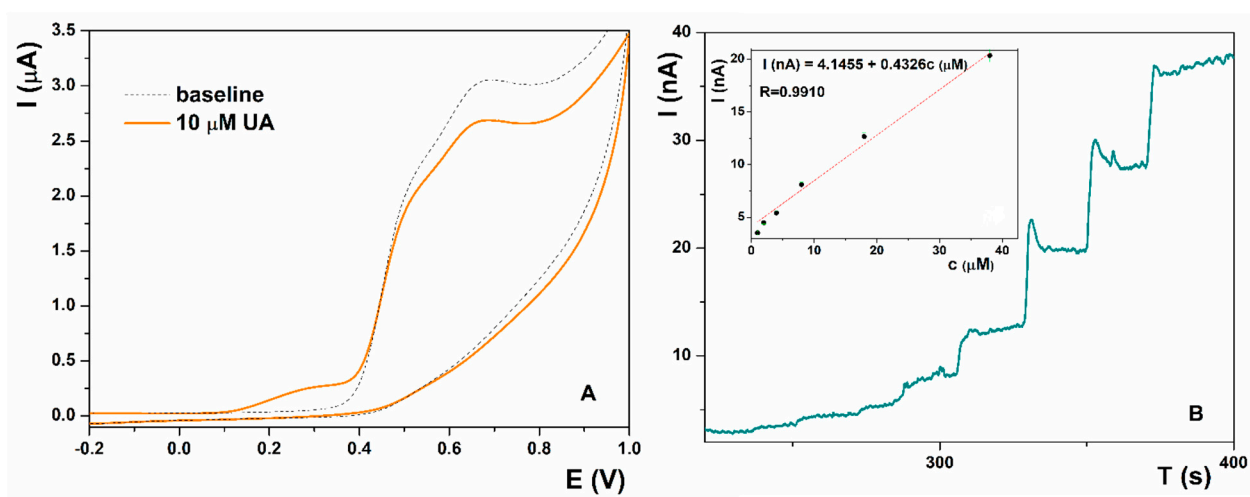**Figure S6.** **(A)** CV in the potential range from 0.5 V to 1 V at the scan rate of 50 mV/s in the biological matrix in the presence and absence of UA **(B)** Amperometric curve of UA in the real sample matrix **(inset B)** Calibration curve of UA standard solutions in the biological matrix.
